# Supplementary material for: Engineering base-excised aptamers for highly specific recognition of adenosine
Source: PubMed Central journal article supplement (PMC8157715; doi:10.1039/d0sc00086h), 2020-02-10
Supplement: SC-011-D0SC00086H-s001.pdf [file SC-011-D0SC00086H-s001.pdf]

## Electronic Supplementary Information

### Engineering Base-Excised Aptamer for Highly Specific Recognition of Adenosine

Yuqing Li, Biwu Liu, Zhicheng Huang, Juewen Liu\*

Department of Chemistry, Waterloo Institute for Nanotechnology

University of Waterloo

Waterloo, Ontario N2L 3G1, Canada

Phone: (+1) 519 888 4567 ext. 38919

Email: [liujw@uwaterloo.ca](mailto:liujw@uwaterloo.ca)

**Table S1.** The DNA sequences used in this work.

| <b>DNA Names</b>        | <b>Sequences (from 5' to 3') and modifications</b> |
|-------------------------|----------------------------------------------------|
| Wide-type adenosine Apt | ACCTGGGGGAGTATTGCGGAGGAAGGT                        |
| One-site Apt            | ACCTTCGGGGAGTATTGCGGAGGAAGGT                       |
| A10-excised Apt         | GTATTGCGGAGGAAGGTTTTTAACCTTCGGGG                   |
| Res-A10-Right cut       | GTATTGCGGAGGAAGGTTTTTAACCTTCGGGGA                  |
| Res-A10-Left cut        | AGTATTGCGGAGGAAGGTTTTTAACCTTCGGGG                  |
| Duplex-1                | GGGGGTATTGCCCCGCAAGGTTTTTAACCTTG                   |
| Duplex-2                | GTATTGCGCCCCGAAGGTTTTTAACCTTCGGGG                  |

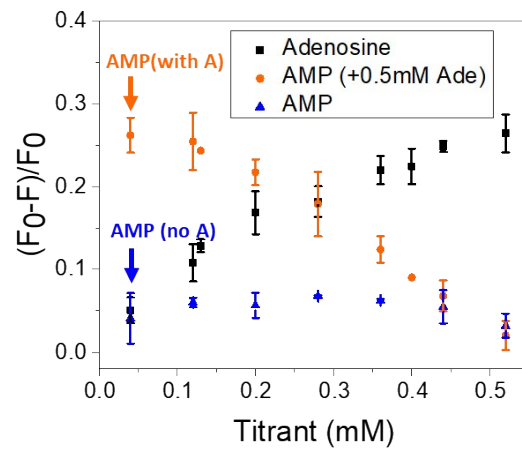

**Figure S1.** Titrating Adenosine or AMP (0.04-0.52 mM) into 50 nM A10-excised Apt in buffer A (20 mM HEPES, 100 mM NaCl, 5 mM MgCl<sub>2</sub>). In orange curve, the DNA was first incubated with 0.5 mM adenosine, then applied to AMP titrations. 50 nM SGI was used to indicate the adenosine or AMP binding to DNA.

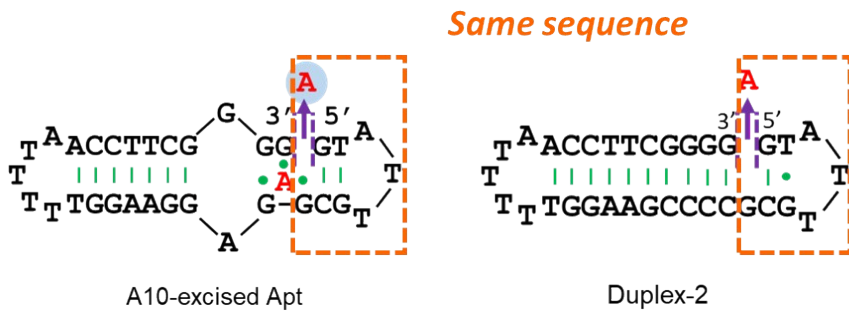

**Figure S2.** The secondary structure of A10-excised Apt and Duplex-2. The regions in the yellow boxes had the same sequence.

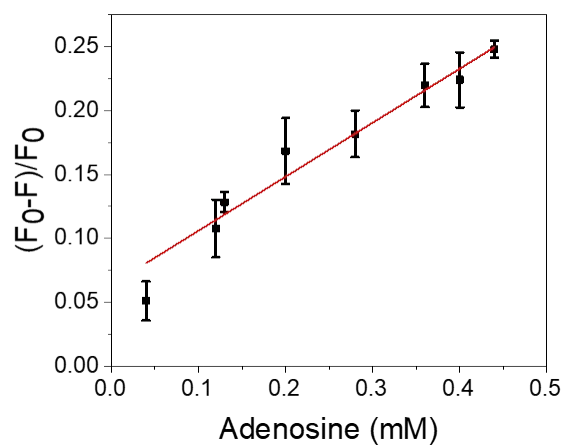

**Figure S3.** Linear fitting data for titrating adenosine (0.04-0.44 mM) into 50 nM A10-excised Apt in buffer A (20 mM HEPES, 100 mM NaCl, 5 mM MgCl<sub>2</sub>). 50 nM SGI was used to screen the adenosine binding. The correlation equation is  $(F_0-F)/F_0 = 0.42[\text{Adenosine}] + 0.06$ . Based on the equation of  $3\sigma/k$ , the limit of detection was calculated to be 46.7  $\mu\text{M}$ .
